# Supplementary material for: Androgen loss weakens anti-tumor immunity and accelerates brain tumor growth
Source: Research Square preprint supplement (doi:10.21203/rs.3.rs-4014556/v1), 2024-03-29
Supplement: Supplementary file 1 [file f661989370b6fe53f786fd07.pdf]

## **Extended Data Materials**

### **Extended Data Figures**

Extended Data Figure 1. Age dependent T cell abundance in male and female GBM tumors

Extended Data Figure 2. Effects of androgen on GBM tumor growth

Extended Data Figure 3. Castration effect on anti-tumor immunity

Extended Data Figure 4. Serum levels of steroid hormones

### **Extended Data Tables**

Extended Data Table 1. Flow antibodies for immune cell subsets

Extended Data Table 2. Flow antibodies for cytokine profiles

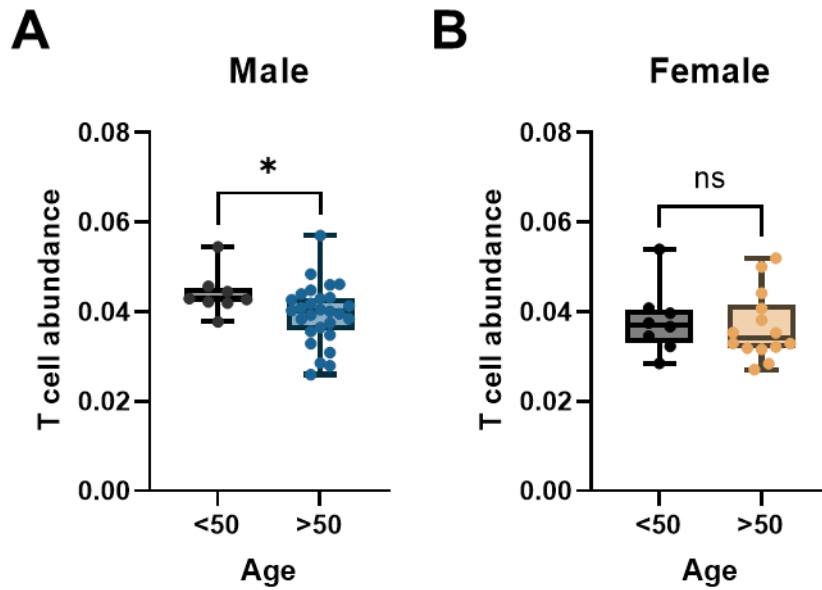

**Extended Data Figure 1. Age dependent T cell abundance in male and female GBM tumors.** T cell abundance was measured after deconvoluting bulk RNA-seq on tumor samples obtained using image-guided biopsy. Average T cell value was obtained for each patient. **A.** Male GBM patients (n=36 total), age <50 (n=8), age  $\geq$ 50 (n=28). **B.** Female GBM patients (n=22 total), age <50 (n=8), age  $\geq$ 50 (n=14). Unpaired student t-test was performed ( $*p<0.05$ ).

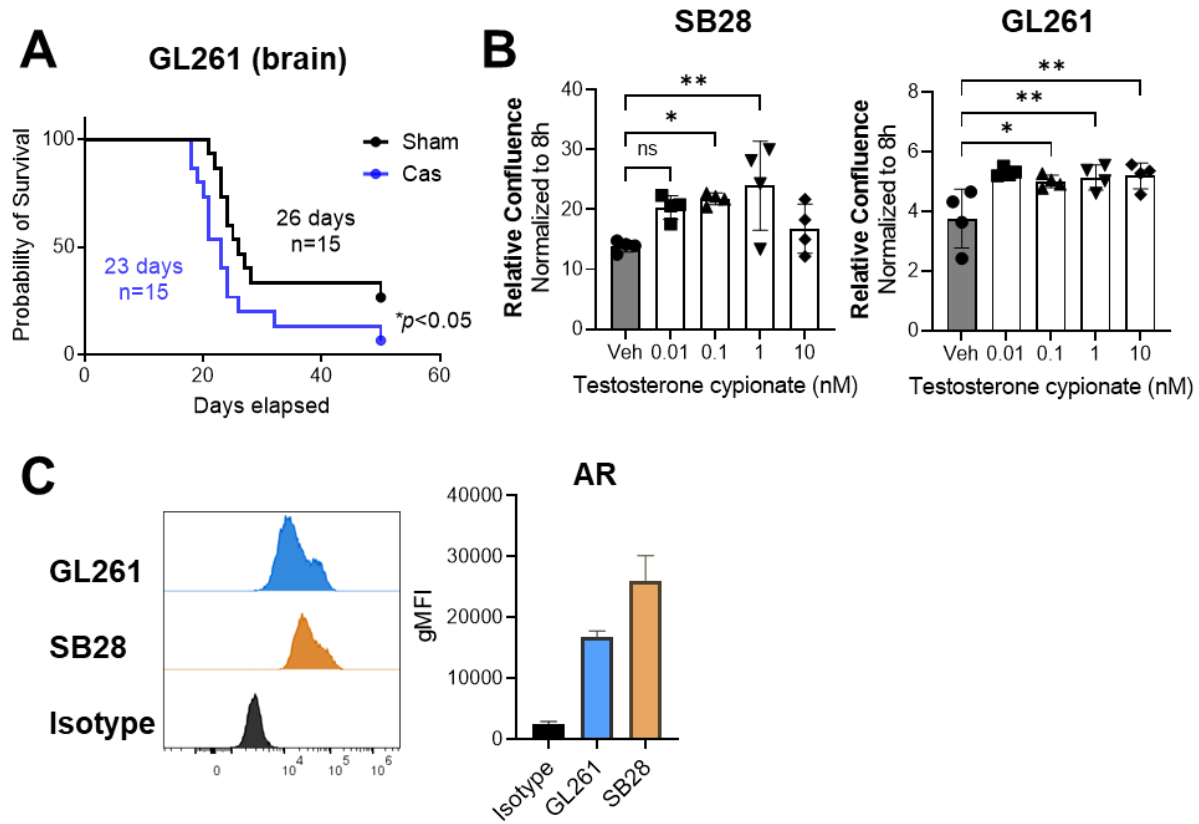

**Extended Data Figure 2. Effects of androgens on GBM tumor growth.** **A.** Survival of GL261-bearing mice after sham or cas surgery. Median survival days and number of animals are indicated in the graph. Data combined from three independent experiments. Log-rank test was performed (\* $p < 0.05$ ). **B.** SB28 or GL261 cells were cultured in the absence or presence of various concentrations of testosterone cypionate for 120h and 96h, respectively. Cell number was counted by Incucyte and normalized to 6h. One-way ANOVA with multiple comparisons (\*\* $p < 0.01$ , \*\*\* $p < 0.001$ ). **C.** Androgen receptor (AR) expression in murine GBM cells. AR expression was measured using flow cytometry. Data shown as representative histogram (left panel) and Mean $\pm$ SD (n=3) (right panel).

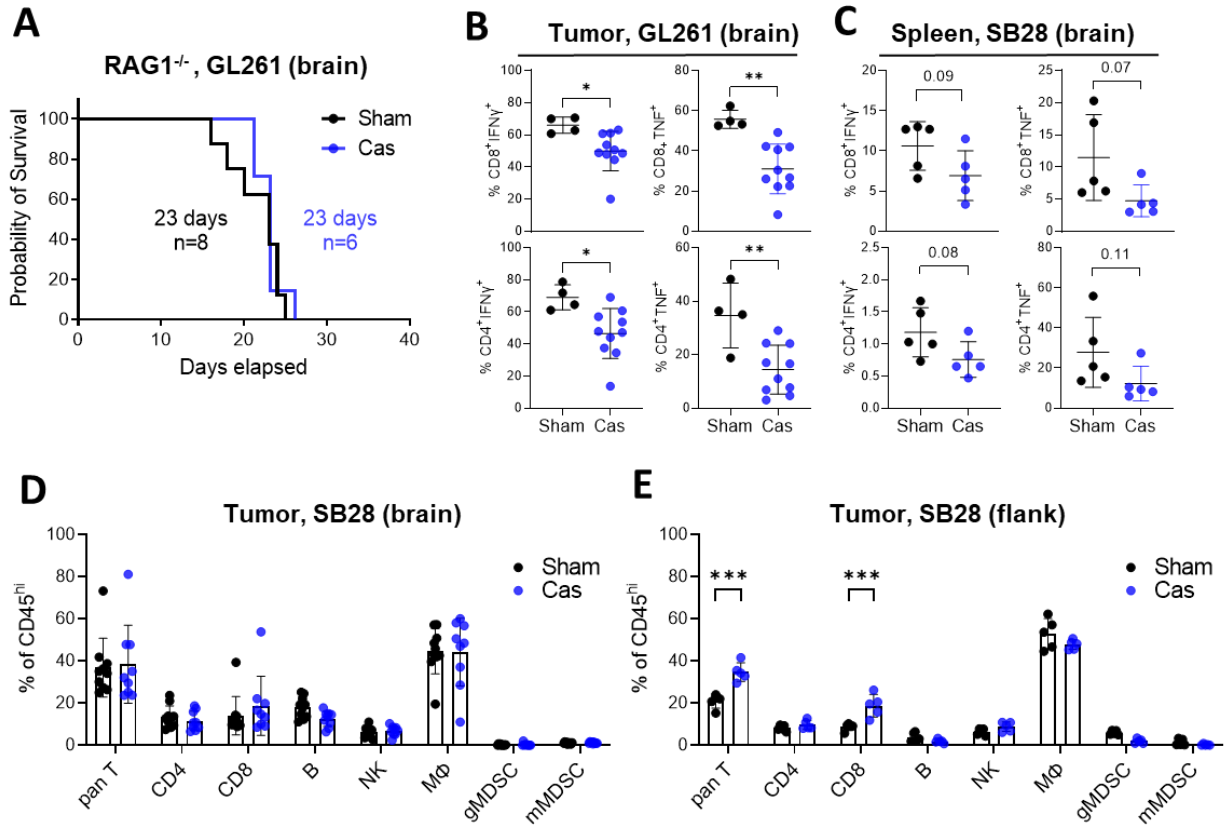

**Extended Data Figure 3. Castration effect on anti-tumor immunity.** **A.** Survival of GL261-bearing RAG1<sup>-/-</sup> mice after sham or cas surgery. Median survival days and number of animals are indicated in the graph. **B.** Intracellular expression of cytokines in T cells from GL261 brain tumor. n=4/sham, n=10/cas. **C.** Intracellular expression of cytokines in T cells from spleen of mice bearing SB28 brain tumor. n=5/sham, n=5/cas. Unpaired student *t*-test (\**p*<0.05, \*\**p*<0.01). **D.** Frequency of immune cell subsets in the SB28 brain tumor measured by flow cytometry. n=10/sham, n=9/cas. **E.** Frequency of immune cell subsets in the SB28 flank tumor measured by flow cytometry. n=5/sham, n=5/cas. Two-way ANOVA with Tukey's multiple comparison test was performed (\**p*<0.05, \*\*\**p*<0.001).

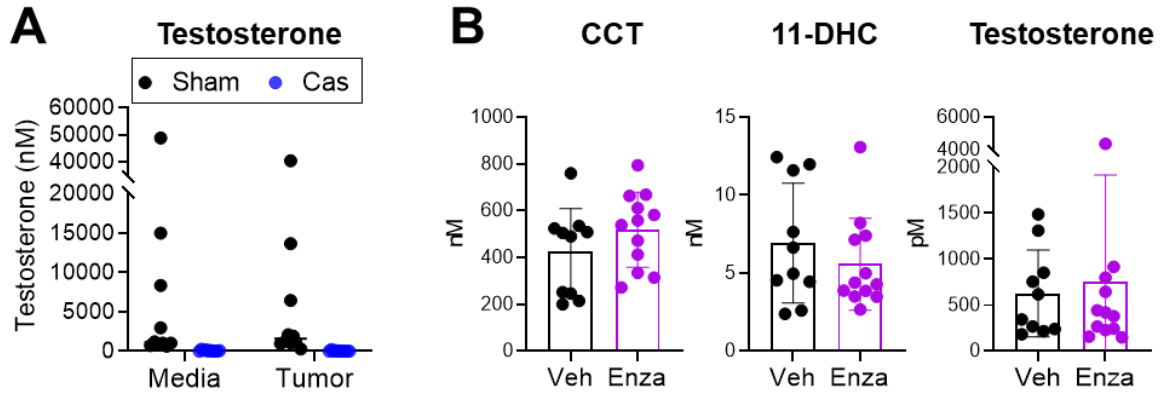

**Extended Data Figure 4. Serum levels of steroid hormones. A.** Mouse serum was collected 14 days after intracranial tumor implantation or media injection. Mass spectrometry analysis was performed to measure testosterone level.  $n=10/\text{group}$ . Two-way ANOVA analysis with Tukey's multiple comparison test was performed ( $*p<0.05$ ,  $**p<0.01$ ,  $***p<0.001$ ). **B.** Serum levels of corticosterone (CCT), 11-dehydrocorticosterone (11-DHC), and testosterone by mass spectrometry from mice bearing SB28 brain tumor treated with vehicle ( $n=10$ ) or enzalutamide ( $n=12$ ).

**Extended Data Table 1.** Flow antibodies for immune cell subsets

| Marker     | Fluorophore     | Clone       | Vendor         | Catalog number | Staining | Dilution |
|------------|-----------------|-------------|----------------|----------------|----------|----------|
| CD11b      | BUV395          | M1/70       | BD Biosciences | 563553         | surface  | 1:250    |
| CD69       | BUV563          | H1.2F3      | BD Biosciences | 741234         | surface  | 1:250    |
| CD11c      | BUV737          | HL3         | BD Biosciences | 612796         | surface  | 1:250    |
| CTLA4      | BV421           | UC10-4B9    | BioLegend      | 106312         | Intra    | 1:250    |
| Ly6G       | V450            | 1A8         | BD Biosciences | 560603         | surface  | 1:250    |
| PD1        | BV510           | 29F.1A12    | BioLegend      | 135241         | surface  | 1:250    |
| CD45R/B220 | BV570           | RA3-6B2     | BioLegend      | 103237         | surface  | 1:250    |
| Ki67       | BV605           | 16A8        | BioLegend      | 652413         | Intra    | 1:250    |
| TIM3       | BV711           | RMT3-23     | BioLegend      | 119727         | Intra    | 1:100    |
| CD3        | BV786           | 145-2C11    | BD Biosciences | 564379         | surface  | 1:250    |
| I-A/I-E    | FITC            | M5/114.15.2 | BioLegend      | 107606         | surface  | 1:250    |
| CD45       | PerCP-Cy5.5     | 30-F11      | BioLegend      | 103132         | surface  | 1:250    |
| Foxp3      | PE              | FJK-16s     | eBioscience    | 2260608        | Intra    | 1:250    |
| LAG3       | PE-dazzle 594   | C9B7W       | BioLegend      | 125224         | surface  | 1:250    |
| NK1.1      | PE-Cy5          | PK136       | BioLegend      | 108716         | surface  | 1:250    |
| CD4        | PE-Cy7          | GK1.5       | BioLegend      | 100422         | surface  | 1:250    |
| CD8        | APC             | 52-6.7      | BioLegend      | 100712         | surface  | 1:250    |
| CD206      | Alexa Fluor 647 | C068C2      | BioLegend      | 141712         | Intra    | 1:250    |
| Ly6C       | Alexa Fluor 700 | HK1.4       | BioLegend      | 128024         | surface  | 1:250    |
| CD68       | APC-Cy7         | FA-11       | BioLegend      | 137024         | intra    | 1:250    |
| F4/80      | APC-Cy7         | BM8         | BioLegend      | 123117         | surface  | 1:250    |

**Extended Data Table 2.** Flow antibodies for cytokine profiles

| Marker        | Fluorophore     | Clone    | Vendor         | Catalog number | Staining | Dilution |
|---------------|-----------------|----------|----------------|----------------|----------|----------|
| CD45          | PerCP-Cy5.5     | 30-F11   | BioLegend      | 103132         | surface  | 1:500    |
| CD3e          | BV786           | 145-2C11 | BD Biosciences | 564379         | surface  | 1:500    |
| CD8a          | PE-Cy5          | 53-6.7   | BD Biosciences | 553034         | surface  | 1:500    |
| CD4           | V450            | RM4-5    | BD Biosciences | 560468         | surface  | 1:500    |
| Foxp3         | Alexa Fluor 488 | FJK-16s  | eBioscience    | 53-5773-82     | Intra    | 1:250    |
| CD44          | BUV737          | IM7      | BD Biosciences | 612799         | surface  | 1:500    |
| IFN- $\gamma$ | PE-dazzle 594   | XMG1.2   | BioLegend      | 505846         | Intra    | 1:250    |
| TNF $\alpha$  | BV605           | MP6-XT22 | BioLegend      | 506329         | Intra    | 1:250    |
| Granzyme B    | BV421           | QA18A28  | BioLegend      | 396414         | Intra    | 1:250    |
